# Supplementary material
Source: Springer Nature journal article supplement (https://www.springermedizin.de/resource/supplementary/12889_2012_6161_MOESM4_ESM.pdf/9497872)

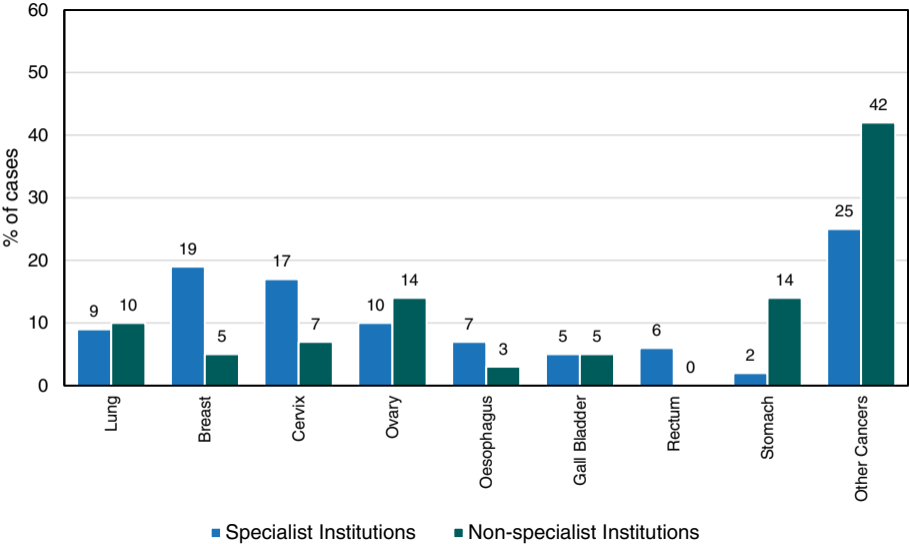

Supplement: MOESM4 [file 9497872]
